# Supplementary material
Source: PubMed Central journal article supplement (PMC7316588)
Supplement: NIHMS1589120-supplement-Supplemental_Material.pdf [file NIHMS1589120-supplement-Supplemental_Material.pdf]

# SUPPLEMENTAL FIGURE I

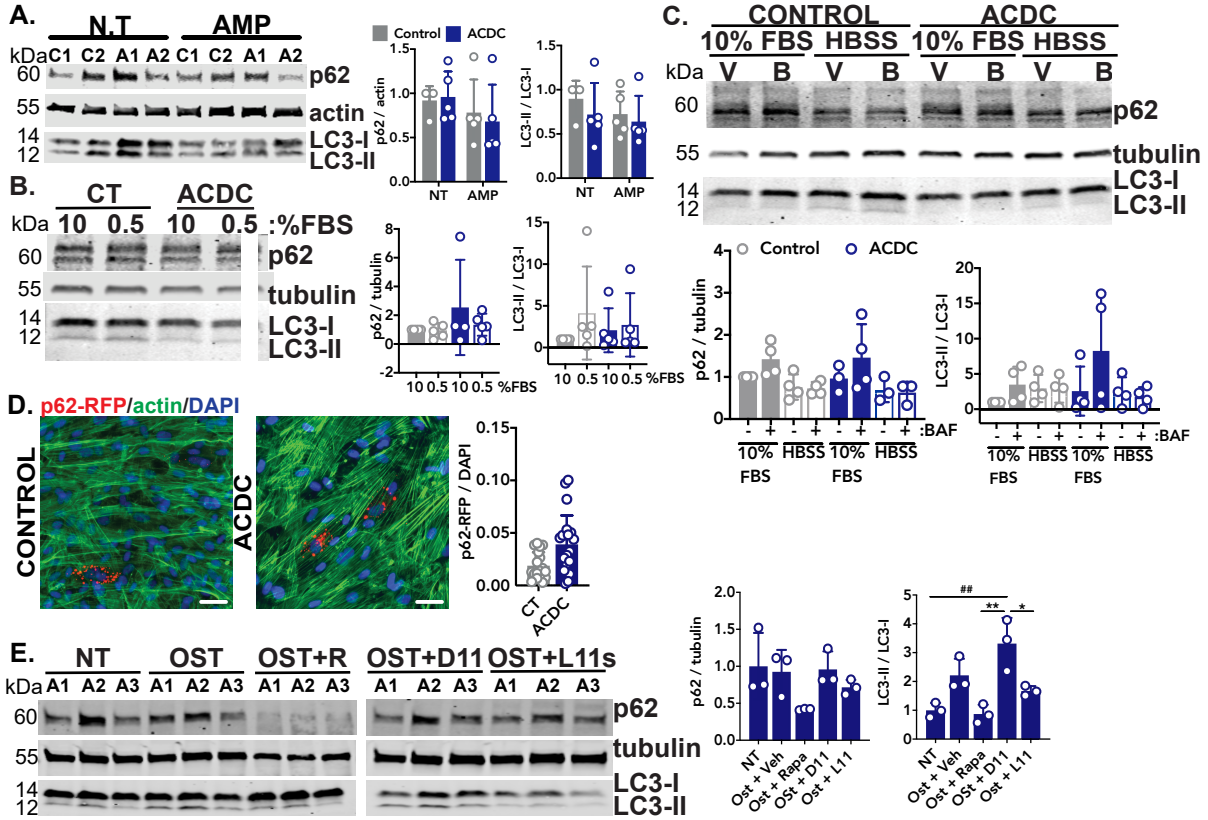

**SUPPLEMENTAL FIGURE I: Autophagy flux is not altered due to CD73 deficiency. A.**

Western blot of cells serum-starved overnight then treated with vehicle or 10 $\mu$ M exogenous AMP for 24hr. Results representative of n=5 replicates using 3 control and 3 ACDC patient cell lines. **B.** Western blot of cells grown under normal growth conditions or under serum-starved conditions (10% FBS and 0.5% FBS, respectively). Results representative of n=3 replicates of 3 control and 3 ACDC patient cell lines. **C.** Western blot of cells in normal growth conditions or amino acid starvation (HBSS) with vehicle or 10nM bafilomycin for 4 hours. Results representative of n=3-4 per group using 3 control and 3 ACDC patient cell lines. In A-C no statistical differences detected using two-way ANOVA with Tukey's multiple comparisons test. **D.** Immunofluorescent staining of cells cultured in osteogenic media for 21 days and then treated with the Premo™ Autophagy Sensor RFP-p62 kit. Intensity of RFP-p62 over DAPI staining determined using ImageJ software. Results representative of 5-11 images from 3 control and 3 ACDC patient cell lines using unpaired Student's t-test with Welch's correction. Scale bar represents 50 $\mu$ m. **E.** Western blot of control and ACDC fibroblasts cultured in osteogenic conditions with vehicle (DMSO), 200nM rapamycin, 10 $\mu$ M Tat-Beclin D11 peptide, or 10 $\mu$ M Tat-Beclin L11s peptide for 21 days. ##p=0.0019, \*\*p=0.0012, \*p=0.0193 using one-way ANOVA with multiple comparisons for statistical analysis. Results representative of n=3 replicates of 3 control patient cells and 3 ACDC patient cells.

## SUPPLEMENTAL FIGURE II

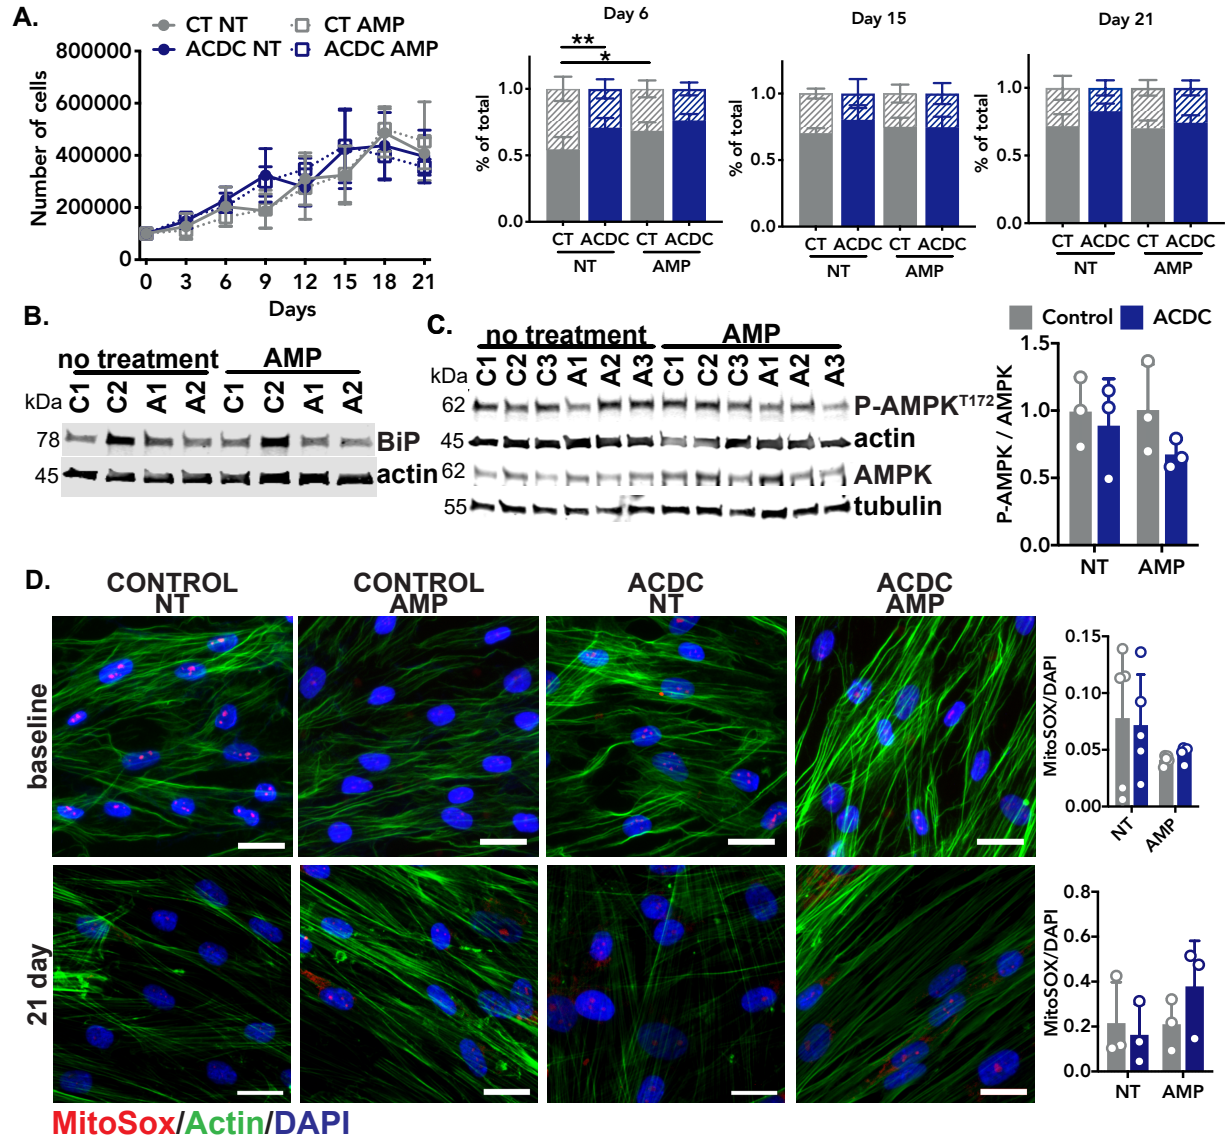

**SUPPLEMENTAL FIGURE II: Exogenous AMP does not alter proliferation, cell death, or cellular stress in CD73 deficient cells.** **A.** Control and ACDC fibroblasts were treated with or without 100 $\mu$ M AMP for 21 days. Cells were counted every 3 days. The proportion of live/total and dead/total was compared between control and ACDC cells. \*\* $p=0.0063$ , \* $p=0.0289$ . Statistical significance was determined by two-way ANOVA with Tukey's multiple comparisons test. Data representative of  $n=4$  replicates of 3 control and 3 ACDC patient fibroblast lines. **B.** Western blot analysis of cells serum-starved overnight then treated with vehicle or 10 $\mu$ M exogenous AMP for 24hr. Results representative of  $n=3$  per group using 3 control patient and 3 ACDC patient cell lines. **C.** Western blot analysis of cells treated with vehicle or 100 $\mu$ M exogenous AMP for 10min. No statistical significance was detected using two-way ANOVA with Tukey's multiple comparisons test. Results representative  $n=3$  replicates of 3 control and 3 ACDC patient cell lines. **D.** Control and ACDC fibroblasts were treated with or without 100 $\mu$ M AMP for 2 hours at baseline and after 21 days of osteogenic treatment and stained with MitoSOX red reagent. Data representative of  $n=4-5$  images each of 3 control and 3 ACDC patient fibroblast lines. No statistical significance detected by two-way ANOVA with Tukey's multiple comparison test. Scalebar represents 25 $\mu$ m.

### SUPPLEMENTAL FIGURE III

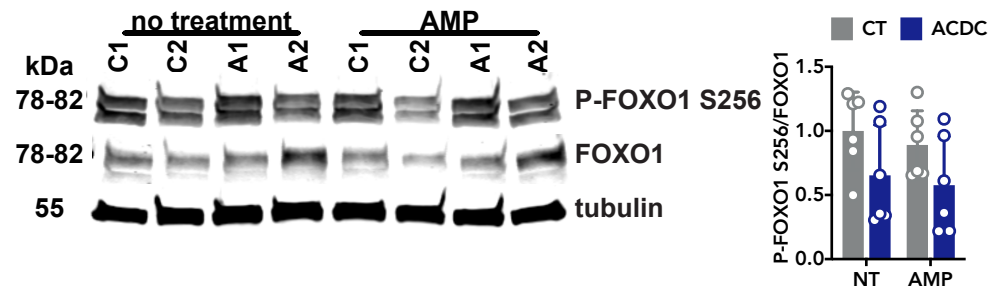

**SUPPLEMENTAL FIGURE III: FOXO1 is not phosphorylated in cells treated with exogenous AMP.** Control and ACDC fibroblasts were given 100 $\mu$ M exogenous AMP for 30 minutes and total cell lysates were analyzed by western blotting for FOXO1 phosphorylation. Results representative of n=6 per group using 3 control patient and 3 ACDC patient cell lines. No statistical difference detected by two-way ANOVA with Tukey's multiple comparisons test.

## Major Resources Table

In order to allow validation and replication of experiments, all essential research materials listed in the Methods should be included in the Major Resources Table below. Authors are encouraged to use public repositories for protocols, data, code, and other materials and provide persistent identifiers and/or links to repositories when available. Authors may add or delete rows as needed.

### Animals (in vivo studies)

Not applicable

### Genetically Modified Animals

Not applicable

### Antibodies

| Target antigen         | Vendor or Source             | Catalog # | Working concentration | Lot #      | Persistent ID / URL                                                                                                                                                                                                                                                                                                                     |
|------------------------|------------------------------|-----------|-----------------------|------------|-----------------------------------------------------------------------------------------------------------------------------------------------------------------------------------------------------------------------------------------------------------------------------------------------------------------------------------------|
| $\alpha$ -tubulin      | LI-COR                       | 926-42213 | 1:2000 (WB)           | C40624-01  | <a href="https://www.licor.com/bio/reagents/alpha-tubulin-mouse-monoclonal-antibody-for-normalization">https://www.licor.com/bio/reagents/alpha-tubulin-mouse-monoclonal-antibody-for-normalization</a>                                                                                                                                 |
| $\beta$ -tubulin       | LI-COR                       | 926-42211 | 1:2000 (WB)           | C40702-01  | <a href="https://www.licor.com/bio/reagents/beta-tubulin-rabbit-polyclonal-antibody-for-normalization">https://www.licor.com/bio/reagents/beta-tubulin-rabbit-polyclonal-antibody-for-normalization</a>                                                                                                                                 |
| $\beta$ -actin         | LI-COR                       | 926-42212 | 1:2000 (WB)           | C70302-01  | <a href="https://www.licor.com/bio/reagents/beta-actin-mouse-monoclonal-antibody-for-normalization">https://www.licor.com/bio/reagents/beta-actin-mouse-monoclonal-antibody-for-normalization</a>                                                                                                                                       |
| p62                    | Cell Signaling               | 5114S     | 36.2ng/mL (WB)        | 6          | <a href="https://www.cellsignal.com/products/primary-antibodies/sqstm1-p62-antibody/5114">https://www.cellsignal.com/products/primary-antibodies/sqstm1-p62-antibody/5114</a>                                                                                                                                                           |
| LC3                    | Cell Signaling               | 12741S    | 64.5ng/mL (WB)        | 4          | <a href="https://www.cellsignal.com/products/primary-antibodies/lc3a-b-d3u4c-xp-rabbit-mab/12741">https://www.cellsignal.com/products/primary-antibodies/lc3a-b-d3u4c-xp-rabbit-mab/12741</a>                                                                                                                                           |
| CD73                   | Abcam                        | ab124725  | 1.37 $\mu$ g/mL (WB)  | GR260532-7 | <a href="https://www.abcam.com/cd73-antibody-epr6115-ab124725.html">https://www.abcam.com/cd73-antibody-epr6115-ab124725.html</a>                                                                                                                                                                                                       |
| CD73                   | Atlas                        | HPA017357 | 0.3 $\mu$ g/mL (IFC)  | B96770     | <a href="https://www.atlasantibodies.com/products/antibodies/primary-antibodies/triple-a-polyclonals/nt5e-antibody-hpa017357/">https://www.atlasantibodies.com/products/antibodies/primary-antibodies/triple-a-polyclonals/nt5e-antibody-hpa017357/</a>                                                                                 |
| P-VASP <sup>S157</sup> | Cell Signaling               | 3111      | 0.146 $\mu$ g/mL (WB) | 5          | <a href="https://www.cellsignal.com/products/primary-antibodies/phospho-vasp-ser157-antibody/3111">https://www.cellsignal.com/products/primary-antibodies/phospho-vasp-ser157-antibody/3111</a>                                                                                                                                         |
| VASP                   | BD Transduction Laboratories | 610447    | 0.25 $\mu$ g/mL (WB)  | 7228895    | <a href="https://www.bdbiosciences.com/us/reagents/research/antibodies-buffers/cell-biology-reagents/cell-biology-antibodies/purified-mouse-anti-vasp-43vasp/p/610447">https://www.bdbiosciences.com/us/reagents/research/antibodies-buffers/cell-biology-reagents/cell-biology-antibodies/purified-mouse-anti-vasp-43vasp/p/610447</a> |
| P-Akt <sup>T308</sup>  | Cell Signaling               | 2965      | 0.704 $\mu$ g/mL (WB) | 5          | <a href="https://www.cellsignal.com/products/primary-antibodies/phospho-akt-thr308-c31e5e-rabbit-mab/2965">https://www.cellsignal.com/products/primary-antibodies/phospho-akt-thr308-c31e5e-rabbit-mab/2965</a>                                                                                                                         |
| P-Akt <sup>S473</sup>  | Cell Signaling               | 4060P     | 0.182 $\mu$ g/mL (WB) | 19         | <a href="https://www.cellsignal.com/products/primary-antibodies/phospho-akt-ser473-d9e-xp-rabbit-mab/4060">https://www.cellsignal.com/products/primary-antibodies/phospho-akt-ser473-d9e-xp-rabbit-mab/4060</a>                                                                                                                         |
| Akt1                   | Cell Signaling               | 2967      | 1:1000 (WB)           | 17         | <a href="https://www.cellsignal.com/products/primary-antibodies/akt1-2h10-mouse-mab/2967">https://www.cellsignal.com/products/primary-antibodies/akt1-2h10-mouse-mab/2967</a>                                                                                                                                                           |

DOI [to be added]

|                                 |                          |            |                                                    |            |                                                                                                                                                                                                                                                                       |
|---------------------------------|--------------------------|------------|----------------------------------------------------|------------|-----------------------------------------------------------------------------------------------------------------------------------------------------------------------------------------------------------------------------------------------------------------------|
| Akt1/2/3                        | Santa Cruz Biotechnology | sc-8312    | 0.8µg/mL (WB)                                      | A0406      | <a href="https://www.scbt.com/p/akt1-2-3-antibody-h-136">https://www.scbt.com/p/akt1-2-3-antibody-h-136</a>                                                                                                                                                           |
| P-AMPK <sup>T172</sup>          | Cell Signaling           | 2535       | 27.0ng/mL (WB)                                     | 16         | <a href="https://www.cellsignal.com/products/primary-antibodies/phospho-ampka-thr172-40h9-rabbit-mab/2535">https://www.cellsignal.com/products/primary-antibodies/phospho-ampka-thr172-40h9-rabbit-mab/2535</a>                                                       |
| AMPK                            | Cell Signaling           | 2793S      | 1.602µg/mL (WB)                                    | 6          | <a href="https://www.cellsignal.com/products/primary-antibodies/ampka-f6-mouse-mab/2793">https://www.cellsignal.com/products/primary-antibodies/ampka-f6-mouse-mab/2793</a>                                                                                           |
| P-FoxO1 <sup>S256</sup>         | Cell Signaling           | 9461       | 0.214µg/mL (WB)                                    | 8          | <a href="https://www.cellsignal.com/products/primary-antibodies/phospho-foxo1-ser256-antibody/9461">https://www.cellsignal.com/products/primary-antibodies/phospho-foxo1-ser256-antibody/9461</a>                                                                     |
| P-FoxO1 <sup>T24</sup>          | Cell Signaling           | 9464T      | 0.1µg/mL (WB)                                      | 7          | <a href="https://www.cellsignal.com/products/primary-antibodies/phospho-foxo1-thr24-foxo3a-thr32-antibody/9464">https://www.cellsignal.com/products/primary-antibodies/phospho-foxo1-thr24-foxo3a-thr32-antibody/9464</a>                                             |
| FoxO1                           | Cell Signaling           | 2880       | 88ng/mL (WB)<br>1.76µg/mL (IFC)<br>1.76µg/mL (IHC) | 11         | <a href="https://www.cellsignal.com/products/primary-antibodies/foxo1-c29h4-rabbit-mab/2880">https://www.cellsignal.com/products/primary-antibodies/foxo1-c29h4-rabbit-mab/2880</a>                                                                                   |
| BiP                             | Cell Signaling           | 3177       | 98.0ng/mL (WB)                                     | 9          | <a href="https://www.cellsignal.com/products/primary-antibodies/bip-c50b12-rabbit-mab/3177">https://www.cellsignal.com/products/primary-antibodies/bip-c50b12-rabbit-mab/3177</a>                                                                                     |
| SMA-α                           | Abcam                    | Ab7817     | 10µg/mL (IFC)                                      | GR241210-2 | <a href="https://www.abcam.com/alpha-smooth-muscle-actin-antibody-1a4-ab7817.html">https://www.abcam.com/alpha-smooth-muscle-actin-antibody-1a4-ab7817.html</a>                                                                                                       |
| TNAP                            | Novus Biologicals        | NBP2-67295 | 1:50 (IFC)                                         | HM0128     | <a href="https://www.novusbio.com/products/alkaline-phosphatase-tissue-non-specific-antibody-sa40-00_nbp2-67295">https://www.novusbio.com/products/alkaline-phosphatase-tissue-non-specific-antibody-sa40-00_nbp2-67295</a>                                           |
| IRDye goat anti-mouse 680       | LI-COR                   | 926-68070  | 0.1µg/mL                                           |            | <a href="https://www.licor.com/bio/reagents/irdye-680rd-goat-anti-mouse-igg-secondary-antibody">https://www.licor.com/bio/reagents/irdye-680rd-goat-anti-mouse-igg-secondary-antibody</a>                                                                             |
| IRDye goat anti-rabbit 680      | LI-COR                   | 926-68071  | 0.1µg/mL                                           |            | <a href="https://www.licor.com/bio/reagents/irdye-680rd-goat-anti-rabbit-igg-secondary-antibody">https://www.licor.com/bio/reagents/irdye-680rd-goat-anti-rabbit-igg-secondary-antibody</a>                                                                           |
| IRDye goat anti-mouse 800       | LI-COR                   | 926-32210  | 0.1µg/mL                                           |            | <a href="https://www.licor.com/bio/reagents/irdye-800cw-goat-anti-mouse-igg-secondary-antibody">https://www.licor.com/bio/reagents/irdye-800cw-goat-anti-mouse-igg-secondary-antibody</a>                                                                             |
| IRDye goat anti-rabbit 800      | LI-COR                   | 926-32211  | 0.1µg/mL                                           |            | <a href="https://www.licor.com/bio/reagents/irdye-800cw-goat-anti-rabbit-igg-secondary-antibody">https://www.licor.com/bio/reagents/irdye-800cw-goat-anti-rabbit-igg-secondary-antibody</a>                                                                           |
| AlexaFluor Goat anti-rabbit 594 | Invitrogen               | A11012     | 0.2mg/mL                                           |            | <a href="https://www.thermofisher.com/antibody/product/Goat-anti-Rabbit-IgG-H-L-Cross-Adsorbed-Secondary-Antibody-Polyclonal/A-11012">https://www.thermofisher.com/antibody/product/Goat-anti-Rabbit-IgG-H-L-Cross-Adsorbed-Secondary-Antibody-Polyclonal/A-11012</a> |

## DNA/cDNA Clones

DOI [to be added]



| Clone Name          | Sequence                                                                                                                                                                                                                                                                                                                                                                                                                                                                                                                                                                                                                                                                                                                                                                                                                                                                                                                                                                                                                                                                                                                                                                                                                                                                                                                                                                                                                                                                                                                                                                                                                                                                                                                                                                          | Source/ Repository | Persistent ID / URL                                                                                                                                                                                     |
|---------------------|-----------------------------------------------------------------------------------------------------------------------------------------------------------------------------------------------------------------------------------------------------------------------------------------------------------------------------------------------------------------------------------------------------------------------------------------------------------------------------------------------------------------------------------------------------------------------------------------------------------------------------------------------------------------------------------------------------------------------------------------------------------------------------------------------------------------------------------------------------------------------------------------------------------------------------------------------------------------------------------------------------------------------------------------------------------------------------------------------------------------------------------------------------------------------------------------------------------------------------------------------------------------------------------------------------------------------------------------------------------------------------------------------------------------------------------------------------------------------------------------------------------------------------------------------------------------------------------------------------------------------------------------------------------------------------------------------------------------------------------------------------------------------------------|--------------------|---------------------------------------------------------------------------------------------------------------------------------------------------------------------------------------------------------|
| pEZX-LvPG04 plasmid | GGCACCAGGCCCCAGTTCTGGCTCCAACCTTACT<br>GAGAAGTCACATGATCTCTCTGGGCCTCAGTTTTC<br>TCCTCTGGAAAATGGAGCTTTTGGAAAGTTAATGC<br>ATGCACAGTGCCTGGCCCTGAGACTGGCATGGAG<br>TGAGTGGAAGAGAGGTTGCCTGACCTGGCTAAAA<br>TTGGTTCTCTGGGCAGACATTTTCCCAAGGGCCAC<br>TGAGAAGACCCTCCTGTTAGGAGTCAGTGAGCTC<br>TGTCGCTGGAGGCATTCAAACAGAGCCTGCGGAC<br>TTCTCACTGCGAAGTTGCCAGAGAATTCAGTGCT<br>CAGAGGAAAGGGAGTGGTTATTCCATCAGAGCTG<br>GTTCCCCAGGAGCGGGAGCAGGGCCTGTAGCACC<br>CAGCCTCTGTCCCTGGCTCCCGTCTATCCGGGATT<br>TTAGCGTTTCCTCTGTAGTTTTCAAGCACTGTCTC<br>ATATGACTCTCGCACCCAGCGAGAGGCCAGGGGAG<br>ATGGTGTCTGCCTGTAAAGAGGGGCAGGCTGGT<br>CCACATAGGTCAAGTGACTTGGCCAAGGTCACCA<br>GAGCAGAGTTTTGAACTTGAGCTGTCTGACTCAA<br>CTGCCTGGGAAGTGCCTGCCCTCCTCTGGCATCC<br>AGGGAGCATGTCTGGGGCTCTGGCTGGGACATA<br>GCCGGACACCTGCGGGCCCTTACGTCTCTAAAG<br>AGAGAAAGAGGGAAGGGCCCCTGTCTAGGGGGT<br>GGTTTCCCTCCAGATGCCACCCCTCCGAGGTCCCC<br>TTCTGCTTCTTCTTGCGGTAGCCAGGGAGGCAGCC<br>CACGGGCAGGGAAGCGGGGGTGGGGGTGCAGAG<br>TCAGAGGTGCACGTGGACAGAGACAGAGAGACA<br>GGGACACGTGGGCAGAGACGGATAAAGACAGAG<br>ACCCAGAGAAAGCCAGATATGTTGACAGACACAG<br>AGACAGACGCCAGAGAGGAAGGCAGACAAAGAG<br>ACGGGTGGAGACAAAGACTCCCACCAAGAGACG<br>CAGAAGGAAGATGCCGACGGTAAAGACAAAACA<br>GGAGACGCGCGCAAGGAGCAGGTCAGAGCCCAG<br>GCTCGCTGAGAGAGGAAGGGCTGGGCTGGGGCA<br>GCCCCGAGGCAGAGAGACCGAGAGTGCGGGGCG<br>GGCGAGGGACGCCAGGGCCGCGTCACCCAGCCC<br>GTTCTAGCTCCGCTCCCGGCAGGGGGCGCCCTG<br>GCCTCGTGGCACGACCGGCCCGCGGGGCGCGGGG<br>CTCGGGCCGGGGGCGGGGCCGGGGCCGGGCTGG<br>GGAGGGGTTGGGGCCGGGGGCGGGGGAGGGGGC<br>GGGCTGCCCGGGCCTCACTCGGGCCCCGCGGCCG<br>CCTTTATAAGGCGGCGGGGGTGGTGGCCCCGGGCC<br>GCGTTGCGCTCCCGCCACTCCGCGCCCGCTATCCT<br>GGCTCCGTGCTCCACGCGCTTGTGCCTGGACGG<br>ACCCTCGCCAGTGCTCTGCGCAGGTAAGGATTCG<br>ACGCTGCCCCGCGCCCTGGTTCCCCAGGGCCCCA<br>GCGGACGTGGTCCATCCCCTTCTGCATCCTCCGCT<br>GGCCCCGTGG | GeneCopoeia        | <a href="https://www.genecopoeia.com/product/search/detail.php?prt=22&amp;cid=58705&amp;key=HPRM30446">https://www.genecopoeia.com/product/search/detail.php?prt=22&amp;cid=58705&amp;key=HPRM30446</a> |

## Primers

| Gene        | Forward Sequence (5' -> 3')                     | Reverse Sequence (5' -> 3')                     | Source |
|-------------|-------------------------------------------------|-------------------------------------------------|--------|
| h18s        | GTAACCCGTTGAACCCATT                             | CCATCCAATCGGTAGTAGCG                            | IDT    |
| hCD73       | GGGCGGAAGGTTCTCTGTAG                            | GAGGAGCCATCCAGATAGACA                           | IDT    |
| hA1AR       | TGGGCCACAGACCTACTTC                             | TACCGGAGAGGGATCTTGACC                           | IDT    |
| hA2aAR      | TGACTCCCATGCTAGGTTGGA                           | CATCCTCAAAGAGACAGGCCA                           | IDT    |
| hA2bAR      | TGTCCCCTCAGGTATAAAAAGT                          | CCCAGGAATGGAGTCAATCCG                           | IDT    |
| hA3AR       | GGCCAATGTTACCTACATCACC                          | CCAGGGCTAGAGAGACAATGAA                          | IDT    |
| hALPL       | ATGGGATGGGTGTCTCCACA                            | CCACGAAGGGGAACCTTGTC                            | IDT    |
| Mutagenesis | TCTGTCTCTGTGTCTGTTAATATATC<br>TGG CTTTCTCTGGGTC | GACCCAGAGAAAGCCAGATATATT<br>AACAG ACACAGAGACAGA | IDT    |

## Cultured Cells

| Name                        | Vendor or Source | Sex (F, M, or unknown) | Persistent ID / URL |
|-----------------------------|------------------|------------------------|---------------------|
| Control patient fibroblasts | Skin biopsy      | F & M                  | N/A                 |
| ACDC patient fibroblasts    | Skin biopsy      | F & M                  | N/A                 |

## Data & Code Availability

Not applicable

## Other

| Description                                              | Source / Repository | Persistent ID / URL                                                                                                                                                     |
|----------------------------------------------------------|---------------------|-------------------------------------------------------------------------------------------------------------------------------------------------------------------------|
| $\beta$ -glycerol phosphate disodium salt pentahydrate   | Sigma-Aldrich       | <a href="https://www.sigmaaldrich.com/catalog/product/sigma/50020">https://www.sigmaaldrich.com/catalog/product/sigma/50020</a>                                         |
| L-ascorbic acid 2-phosphate sesquimagnesium salt hydrate | Sigma-Aldrich       | <a href="https://www.sigmaaldrich.com/catalog/product/sigma/a8960">https://www.sigmaaldrich.com/catalog/product/sigma/a8960</a>                                         |
| dexamethasone                                            | Sigma-Aldrich       | <a href="https://www.sigmaaldrich.com/catalog/product/sigma/d4902">https://www.sigmaaldrich.com/catalog/product/sigma/d4902</a>                                         |
| EHNA hydrochloride                                       | Sigma-Aldrich       | <a href="https://www.sigmaaldrich.com/catalog/product/sigma/e114">https://www.sigmaaldrich.com/catalog/product/sigma/e114</a>                                           |
| adenosine 5'-monophosphate monohydrate (AMP)             | Sigma-Aldrich       | <a href="https://www.sigmaaldrich.com/catalog/product/sigma/a2252">https://www.sigmaaldrich.com/catalog/product/sigma/a2252</a>                                         |
| Rapamycin                                                | Gemini Bio-Products | <a href="https://www.gembio.com/product/rapamycin-powder">https://www.gembio.com/product/rapamycin-powder</a>                                                           |
| AS1842856                                                | Sigma-Aldrich       | <a href="https://www.sigmaaldrich.com/catalog/product/mm/506081?lang=en&amp;region=US">https://www.sigmaaldrich.com/catalog/product/mm/506081?lang=en&amp;region=US</a> |
| bafilomycin A1                                           | Sigma-Aldrich       | <a href="https://www.sigmaaldrich.com/catalog/product/sigma/b1793">https://www.sigmaaldrich.com/catalog/product/sigma/b1793</a>                                         |
| 3-isobutyl-1-methylxanthine                              | Sigma-Aldrich       | <a href="https://www.sigmaaldrich.com/catalog/product/sigma/i5879">https://www.sigmaaldrich.com/catalog/product/sigma/i5879</a>                                         |

DOI [to be added]

|                                                                                             |                     |                                                                                                                                                                                                                                                                                                                                                         |
|---------------------------------------------------------------------------------------------|---------------------|---------------------------------------------------------------------------------------------------------------------------------------------------------------------------------------------------------------------------------------------------------------------------------------------------------------------------------------------------------|
| Forskolin                                                                                   | Tocris              | <a href="https://www.tocris.com/products/forskolin_1099">https://www.tocris.com/products/forskolin_1099</a>                                                                                                                                                                                                                                             |
| 8-Bromoadenosine 3',5'-cyclic monophosphate sodium salt                                     | Sigma-Aldrich       | <a href="https://www.sigmaaldrich.com/catalog/product/sigma/b7880">https://www.sigmaaldrich.com/catalog/product/sigma/b7880</a>                                                                                                                                                                                                                         |
| Alizarin Red S                                                                              | Sigma-Aldrich       | <a href="https://www.sigmaaldrich.com/catalog/product/sigma/a5533">https://www.sigmaaldrich.com/catalog/product/sigma/a5533</a>                                                                                                                                                                                                                         |
| Tat-Beclin 1 D11 Autophagy Inducing Peptide                                                 | Novus Biologicals   | <a href="https://www.novusbio.com/products/tat-beclin-1-autophagy-inducing-peptide_nbp2-49888">https://www.novusbio.com/products/tat-beclin-1-autophagy-inducing-peptide_nbp2-49888</a>                                                                                                                                                                 |
| Tat-Beclin 1 L11S Autophagy Inducing Peptide                                                | Novus Biologicals   | <a href="https://www.novusbio.com/products/tat-beclin-1-peptide_nbp2-49887#protocols-faqs">https://www.novusbio.com/products/tat-beclin-1-peptide_nbp2-49887#protocols-faqs</a>                                                                                                                                                                         |
| CellTiter 96® AQueous One Solution Cell Proliferation Assay (MTS)                           | Promega             | <a href="https://www.promega.com/products/cell-health-assays/cell-viability-and-cytotoxicity-assays/celltiter-96-aqueous-one-solution-cell-proliferation-assay- mts /">https://www.promega.com/products/cell-health-assays/cell-viability-and-cytotoxicity-assays/celltiter-96-aqueous-one-solution-cell-proliferation-assay- mts /</a>                 |
| RNeasy Mini Kit                                                                             | Qiagen              | <a href="https://www.qiagen.com/us/products/discovery-and-translational-research/dna-rna-purification/rna-purification/total-rna/rneasy-mini-kit/">https://www.qiagen.com/us/products/discovery-and-translational-research/dna-rna-purification/rna-purification/total-rna/rneasy-mini-kit/</a>                                                         |
| High-Capacity cDNA Reverse Transcription Kit                                                | Thermo Fisher       | <a href="https://www.thermofisher.com/order/catalog/product/4368814#/4368814">https://www.thermofisher.com/order/catalog/product/4368814#/4368814</a>                                                                                                                                                                                                   |
| Direct cAMP ELISA kit                                                                       | Enzo                | <a href="https://www.enzolifesciences.com/ADI-900-066/direct-camp-elisa-kit/">https://www.enzolifesciences.com/ADI-900-066/direct-camp-elisa-kit/</a>                                                                                                                                                                                                   |
| SIGMAFAST™ 5-bromo-4-chloro-3-indolyl phosphate (BCIP)/nitro blue tetrazolium (NBT) tablets | Sigma-Aldrich       | <a href="https://www.sigmaaldrich.com/catalog/product/sigma/b5655">https://www.sigmaaldrich.com/catalog/product/sigma/b5655</a>                                                                                                                                                                                                                         |
| Premo™ Autophagy Sensor RFP-p62 Kit                                                         | Invitrogen          | <a href="https://www.thermofisher.com/order/catalog/product/P36241">https://www.thermofisher.com/order/catalog/product/P36241</a>                                                                                                                                                                                                                       |
| MitoSOX™ Red Mitochondrial Superoxide Indicator                                             | Invitrogen          | <a href="https://www.thermofisher.com/order/catalog/product/M36008">https://www.thermofisher.com/order/catalog/product/M36008</a>                                                                                                                                                                                                                       |
| QuikCHange II XL Site-Directed Mutagenesis Kit                                              | Agilent             | <a href="https://www.agilent.com/store/en_US/Prod-200521/200521">https://www.agilent.com/store/en_US/Prod-200521/200521</a>                                                                                                                                                                                                                             |
| Monarch® Plasmid Miniprep Kit                                                               | New England Biolabs | <a href="https://www.neb.com/products/t1010-monarch-plasmid-miniprep-kit">https://www.neb.com/products/t1010-monarch-plasmid-miniprep-kit</a>                                                                                                                                                                                                           |
| Lipfectamine LTX Reagent with PLUS Reagent                                                  | Invitrogen          | <a href="https://www.thermofisher.com/order/catalog/product/15338030">https://www.thermofisher.com/order/catalog/product/15338030</a>                                                                                                                                                                                                                   |
| Secrete-Pair™ Dual Luminescence Assay Kit                                                   | GeneCopoeia         | <a href="https://www.genecopoeia.com/product/secrete-pair/secrete-pair-gaussia-luciferase-assay-kit/">https://www.genecopoeia.com/product/secrete-pair/secrete-pair-gaussia-luciferase-assay-kit/</a>                                                                                                                                                   |
| Von Kossa Method of Calcium Kit                                                             | Polysciences        | <a href="https://www.polysciences.com/default/catalog-products/life-sciences/histology-microscopy/staining-histology-cytology/silver-stains/von-kossa-method-for-calcium-kit/">https://www.polysciences.com/default/catalog-products/life-sciences/histology-microscopy/staining-histology-cytology/silver-stains/von-kossa-method-for-calcium-kit/</a> |

SUPPLEMENTAL FIGURE IV: Final unedited western blot images and Major Resources table.
